# Supplementary material for: Straw Mulching Reduces the Harmful Effects of Extreme Hydrological and Temperature Conditions in Citrus Orchards
Source: PLoS One. 2014 Jan 28;9(1):e87094. doi: 10.1371/journal.pone.0087094 (PMC3904954; doi:10.1371/journal.pone.0087094)
Supplement: Table S4 — Field data and summary statistics of runoff under control (CK) and straw mulching (SM) treatments during 2010 and 2011. (XLS) [file pone.0087094.s004.xls]

## Sheet: Table S4
	Table S4 Field data and summary statistics of runoff under control (CK) and straw mulching (SM) treatments during 2010 and 2011
	Runoff data						Summary statistics for runoff
	Date (D/M/Y)	CK-Runoff(mm)		SM-Runoff(mm)			Year	Treatment	Size	Mean	Median	Std.Dev	Std.Err	95% Conf	99% Conf	Total	Min	Max	Normality Test	Wilcoxon Signed Rank Test
		Mean	Std.Err	Mean	Std.Err		2010	CK	22	6.58798	3.48934	8.17735	1.74342	3.62571	4.93662	144.936	1.16603	37.743	Failed (P < 0.050)	T+= 2; T-= -251; W= -249 (P< 0.001)
	06/03/2010	1.51857	1.01269	1.89021	0.0675134			SM	22	4.86355	2.67582	6.04637	1.28909	2.68087	3.65016	106.998	1.01038	25.0038
	01/04/2010	3.34505	0.768823	2.69662	0.500438		2011	CK	29	3.33096	2.54777	3.17308	0.589226	1.207	1.62831	96.598	0.533276	15.7819	Failed (P < 0.050)	T+= 0; T-= -435; W= -435 (P < 0.001)
	21/04/2010	18.0793	4.20233	16.6541	3.68429			SM	29	2.69153	1.9198	2.48061	0.460638	0.943593	1.27296	78.0543	0.424268	11.7321
	14/05/2010	3.0836	0.876218	2.65501	0.891689
	17/05/2010	1.16603	0.0891726	1.12315	0.446677
	22/05/2010	2.1939	0.381245	1.42941	0.595846
	28/05/2010	3.09909	0.493164	2.24742	0.291684
	09/06/2010	13.4397	3	11.6447	1.02921
	03/07/2010	5.35494	0.65781	3.37283	0.464979
	08/07/2010	1.97952	0.745173	1.533	0.156657
	18/07/2010	5.81466	0.828918	3.88175	0.585863
	26/07/2010	5.38591	1.42392	3.06487	0.288356
	20/08/2010	1.58283	2.91788	1.01038	0.866732
	21/08/2010	2.36736	0.768823	1.51117	0.500438
	23/08/2010	3.06931	2.20233	1.95925	0.684286
	24/08/2010	3.63362	0.876218	2.31947	0.891689
	25/08/2010	2.39489	0.0891726	1.52874	0.446677
	01/09/2010	5.21677	0.381245	3.37226	0.595846
	05/09/2010	37.743	2.82892	25.0038	1.58586
	06/09/2010	17.162	1.42392	11.8073	0.288356
	09/09/2010	3.86163	2.0564	2.93013	2.95178
	25/10/2010	4.84389	2	3.36245	2.2
	11/02/2011	0.533276	0.231242	0.424268	0.180919
	01/03/2011	1.78344	0.332075	1.6269	0.168829
	21/03/2011	2.54777	2.25461	1.48494	0.92247
	04/04/2011	1.35575	0.613476	1.06655	0.439819
	03/05/2011	1.1465	1.08207	0.636402	0.459987
	11/05/2011	2.80255	0.768344	2.44035	0.253243
	15/06/2011	1.19745	0.630991	0.9	0.212132
	18/06/2011	3.82166	1.743	3.003	0.87604
	23/06/2011	5	1.5566	4.26621	0.49594
	07/07/2011	2.54777	0.879637	2.13311	0.354036
	13/07/2011	0.8	0.339556	0.639932	0.339556
	20/07/2011	2.54777	0.45459	2.33347	0.0710107
	22/07/2011	0.764331	0.263891	0.639932	0.20711
	27/07/2011	4.84076	1.21881	4.26621	0.997267
	30/07/2011	1.27389	0.439819	1.06655	0.536914
	02/08/2011	5.35032	0.942238	4.90614	2.35477
	06/08/2011	6.02582	1.97343	5.09554	2.99541
	18/08/2011	2.80255	1.8726	1.9198	0.529062
	23/08/2011	2.5825	0.500801	2.34642	0.774452
	09/09/2011	10.3037	3.59641	8.60832	1.066
	20/09/2011	15.7819	5.59101	11.7321	6.74824
	29/09/2011	1.35575	0.173658	1.27389	0.0126815
	03/10/2011	1.78344	0.615746	1.49317	0.0873839
	14/10/2011	1.78344	0.977746	1.32253	0.530632
	25/10/2011	3.56688	1.23149	2.98635	1.8525
	08/11/2011	5.16499	1.2641	3.62628	0.667815
	19/11/2011	1.78344	0.263113	1.65941	0.218636
	02/12/2011	3.82166	1.77196	2.98635	0.567343
	07/12/2011	1.52866	0.754032	1.17321	0.056834
